# Supplementary material
Source: PubMed Central journal article supplement (PMC4793364)
Supplement: abek015022.ww1_default.pdf [file abek015022.ww1_default.pdf]

Diagnostic categories for exposures according to main diagnoses and E codes in the National Patient Register and the Cause of Death Register.

| <b>Death of parent, grandparent or sibling</b>                                                      | <b>ICD8 in 1973-1986</b>        | <b>ICD9 in 1987-1996</b>        | <b>ICD10 in 1997-2006</b>                 |
|-----------------------------------------------------------------------------------------------------|---------------------------------|---------------------------------|-------------------------------------------|
| 1) Death caused by suicide (including undetermined intent)                                          | E950-E959, E980-E989            | E950-E959, E980-E989            | X60-X84, Y10-Y34                          |
| 2) Death caused by injury/accident of a parent and sibling                                          | E800-E949, E960-E979, E990-E999 | E800-E949, E960-E979, E990-E999 | V01-X59, X85-Y09, Y35-Y98                 |
| <i>Contributing causes of death by injury/accident, not suicidal</i>                                |                                 |                                 |                                           |
| Intracranial injury, fracture of skull and facial bones                                             | 800-801, 803-804, 852-854       | 800-801, 803-804, 852-854       | S020-S021, S023-S024 S027-S029, S064-S069 |
| Burns and corrosions of respiratory tract, other internal organs, and of >49% of body surface       | 946-948                         | 946-947, 948FGHWX               | T27-T28, T293, T297, T315-T319, T325-T329 |
| Asphyxiation and other accidental threats to breathing                                              | 994,7, E913, E911, E912         | 994H, E913, E911, E912          | T71, W75-W84                              |
| Anaphylactic shock, certain reactions to transfusion, infusion, therapeutic injection               | 782,9, 999,4,                   | 995A, 999E, 999W                | T780, T782, T802, T805, T809              |
| Traumatic chock                                                                                     | 995,5, 999,8                    | 958E, 998A                      | T794, T811                                |
| Complications of trauma or transfusion, infusion, therapeutic injection; air embolism, fat embolism | 995,00, 995,10, 998,91          | 958A, 958B, 999B                | T790, T791, T800                          |
| Accidental drowning and submersion                                                                  | 994,1; E910                     | 994B, E910                      | W65-W74, T751                             |
| Assault, maltreatment syndromes                                                                     | E960-E969                       | E960-E969, 995F                 | X85-Y099, T74                             |
| Legal intervention and operations of war                                                            | E970-E979, E990-E999            | E976-E977, E997-E999            | Y35-Y36                                   |
| Shock from lightning or electric current                                                            | 994,00, 994,80, E907            | 994A, 994W, E907                | T750, T754, X33                           |
| Poisoning and toxic effects                                                                         | 960-989, E859, E869, E877       | 960-989, E859, E866             | T36-T65, X40-49                           |
| Injury of internal organs and blood vessels                                                         | 860-869                         | 860-869, 900-902                | S15, S25-S28, S35-S37                     |

3) Death by all other causes
